# Supplementary material for: Microecological recombination of Angelica sinensis driven by the transplanting of “alpine seedling–cellar planting–dam cultivation”
Source: PeerJ journal article supplement (doi:10.7717/peerj.19208), 2025-03-31
Supplement: TableS1.xlsx [file TableS1.xlsx]

## Sheet: Sheet1
Table S1. Alpha diversity index of endophyte and soil microorganisms in A. sinensis
Sample type Place and index			Xizhai Town (XZ)				Qingshui Town (QS)
			Ace	Shannon	Shannoneven	Coverage	Ace	Shannon	Shannoneven	Coverage
Bacteria	Endophytes	Alpine seedling root (M)	1,843.008,6ab	4.646,4	0.642,2	0.982,1	1,120.979,9b	3.804,7	0.563,8	0.989,3
		Cellar planting root (J)	3,248.635,0a	5.505,0	0.741,3	0.972,2	2,727.134,9a	4.948,6	0.682,0	0.975,4
		Dam medicinal root (Y)	1,473.121,4b	4.440,6	0.628,1	0.986,9	1,295.285,5b	4.004,9	0.600,6	0.988,0
	Soil	Alpine rhizosphere soil (MS)	4,145.470,5a	7.061,8	0.873,8	0.959,6	4,032.803,2	6.932,1	0.863,8	0.959,2
		Cellar rhizosphere soil (JS)	3,672.572,4b	6.679,1	0.841,7	0.963,3	3,938.150,2	6.981,0	0.869,4	0.961,5
		Dam rhizosphere soil (YS)	3,831.326,1b	6.925,8	0.866,2	0.962,4	3,876.572,8	6.947,8	0.865,8	0.962,6
		Dam non-rhizosphere soil (GS)	3,831.453,7	6.699,4	0.854,0	0.960,0	3,919.258,0	6.830,2	0.854,0	0.959,8
Fungi	Endophytes	Alpine seedling root (M)	102.269,0b	3.008,3a	0.658,4a	0.999,8	151.031,3b	3.468,5a	0.695,9a	0.999,9
		Cellar planting root (J)	227.307,7a	2.098,5ab	0.398,1b	0.999,2	242.318,6a	1.857,4b	0.349,9b	0.999,1
		Dam medicinal root (Y)	66.943,2b	1.519,0b	0.383,8b	0.999,9	80.667,1c	2.488,5ab	0.598,2a	0.999,9
	Soil	Alpine rhizosphere soil (MS)	918.444,6a	3.942,1a	0.592,2a	0.996,7	1040.951,3a	3.975,3	0.584,6ab	0.996,4
		Cellar rhizosphere soil (JS)	767.842,1a	3.518,1a	0.546,7a	0.997,0	838.974,1b	3.288,8	0.506,8b	0.996,9
		Dam rhizosphere soil (YS)	606.647,7b	2.534,2b	0.412,8b	0.997,4	800.214,9b	4.187,4	0.642,8a	0.997,1
		Dam non-rhizosphere soil (GS)	705.306,9	4.258,4	0.601,0	0.997,3	813.022,9	4.502,5	0.672,8	0.997,2
Note: within the same sample type, different lowercase letters indicate significant differences among the three transplanting samples（ANOVA, p < 0.05）
